# Supplementary figures and images for: Fe3O4/MWCNT as a heterogeneous Fenton catalyst: degradation pathways of tetrabromobisphenol A
Source: Royal Society of Chemistry journal article supplement (doi:10.1039/c4ra02333a), 2014-01-01

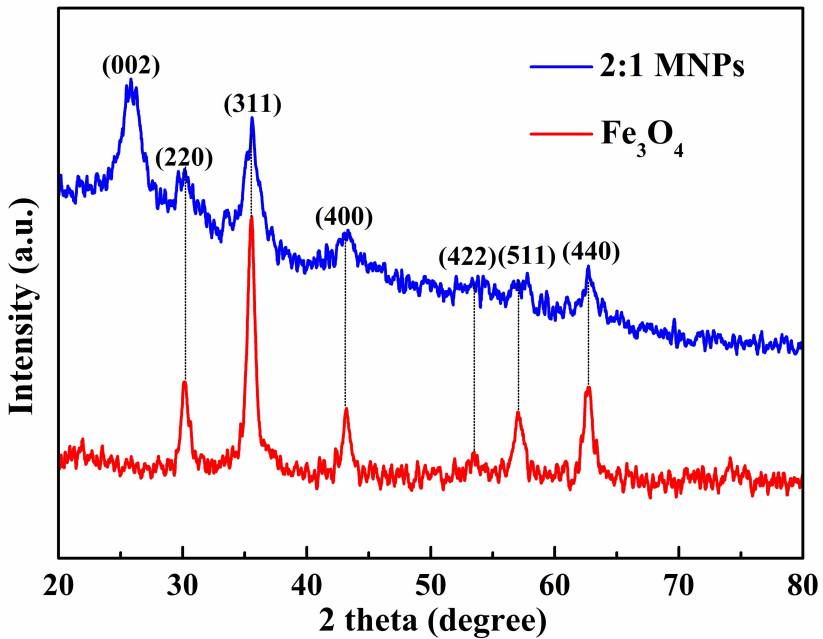

Supplement: c4ra02333a1.pdf [file c4ra02333a1.pdf]

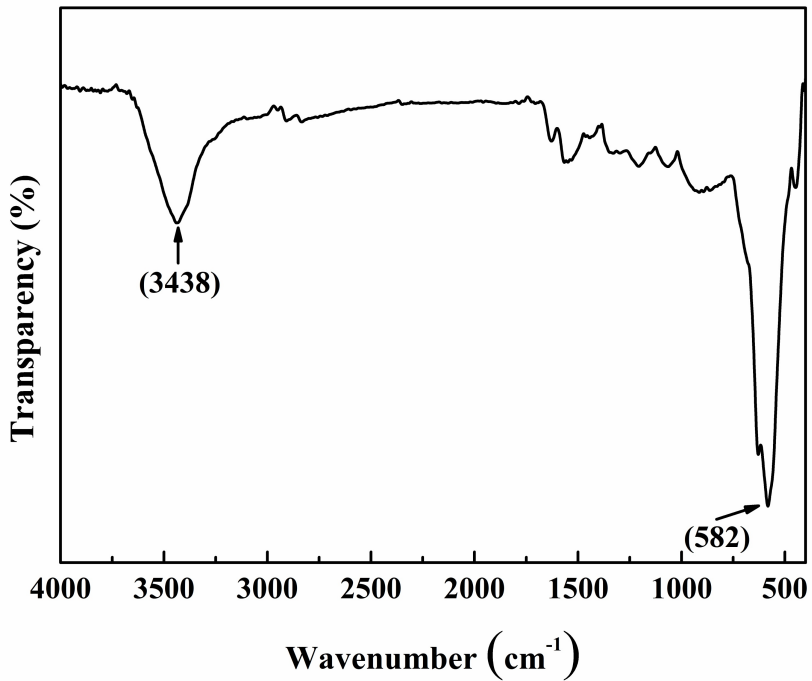

Supplement: c4ra02333a2.pdf [file c4ra02333a2.pdf]

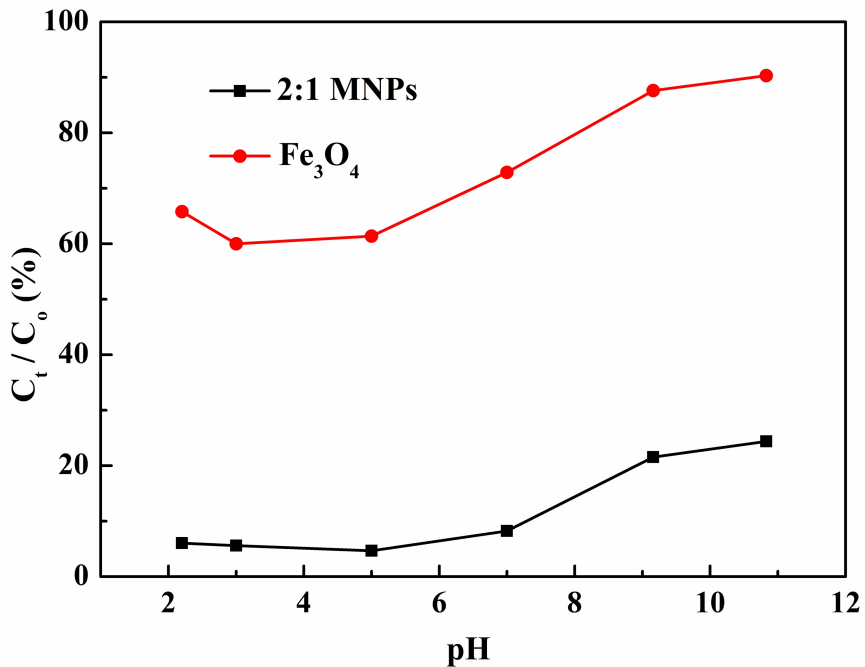

Supplement: c4ra02333a4.pdf [file c4ra02333a4.pdf]

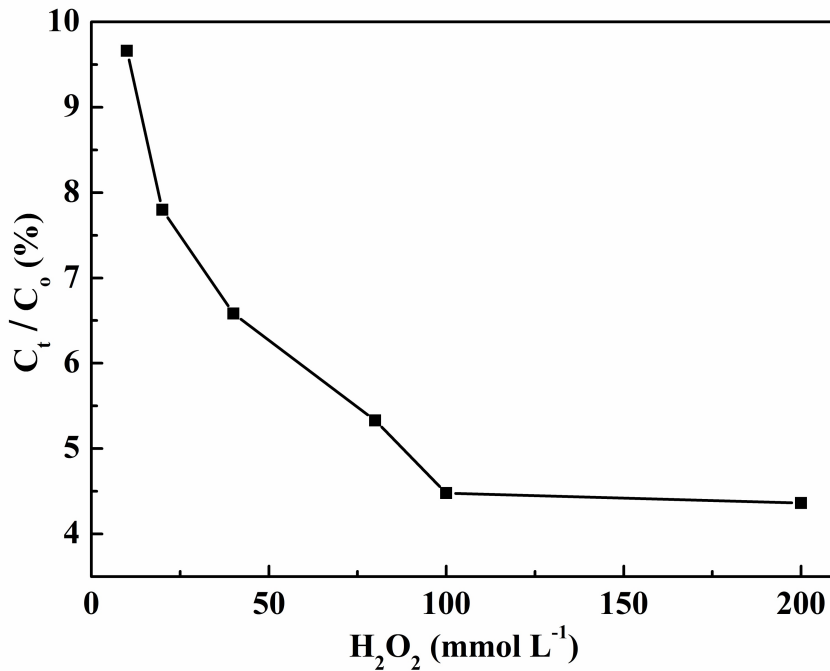

Supplement: c4ra02333a5.pdf [file c4ra02333a5.pdf]

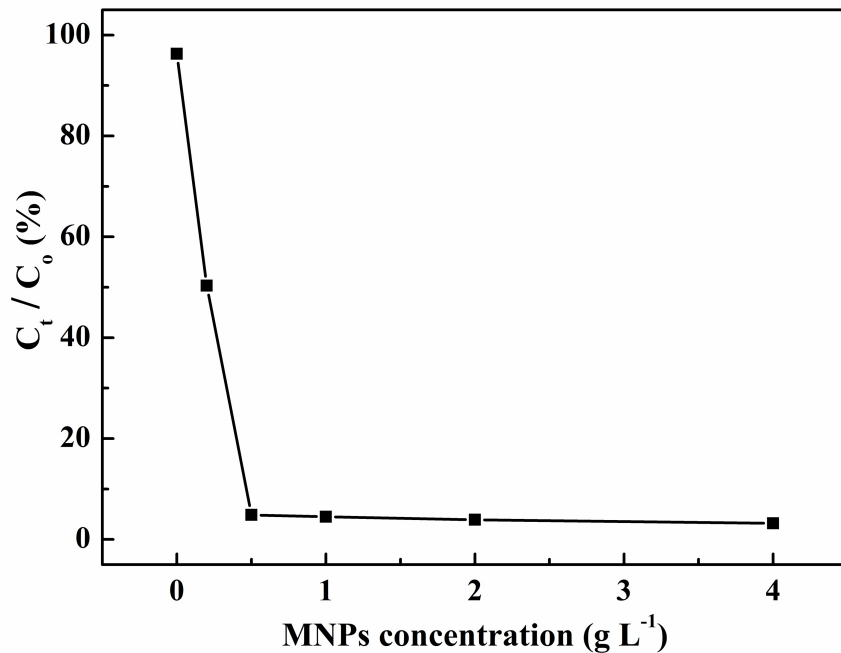

Supplement: c4ra02333a6.pdf [file c4ra02333a6.pdf]
